# Supplementary material
Source: Springer Nature journal article supplement (https://www.springermedizin.de/resource/supplementary/13054_2012_1069_MOESM4_ESM.pdf/9711132)

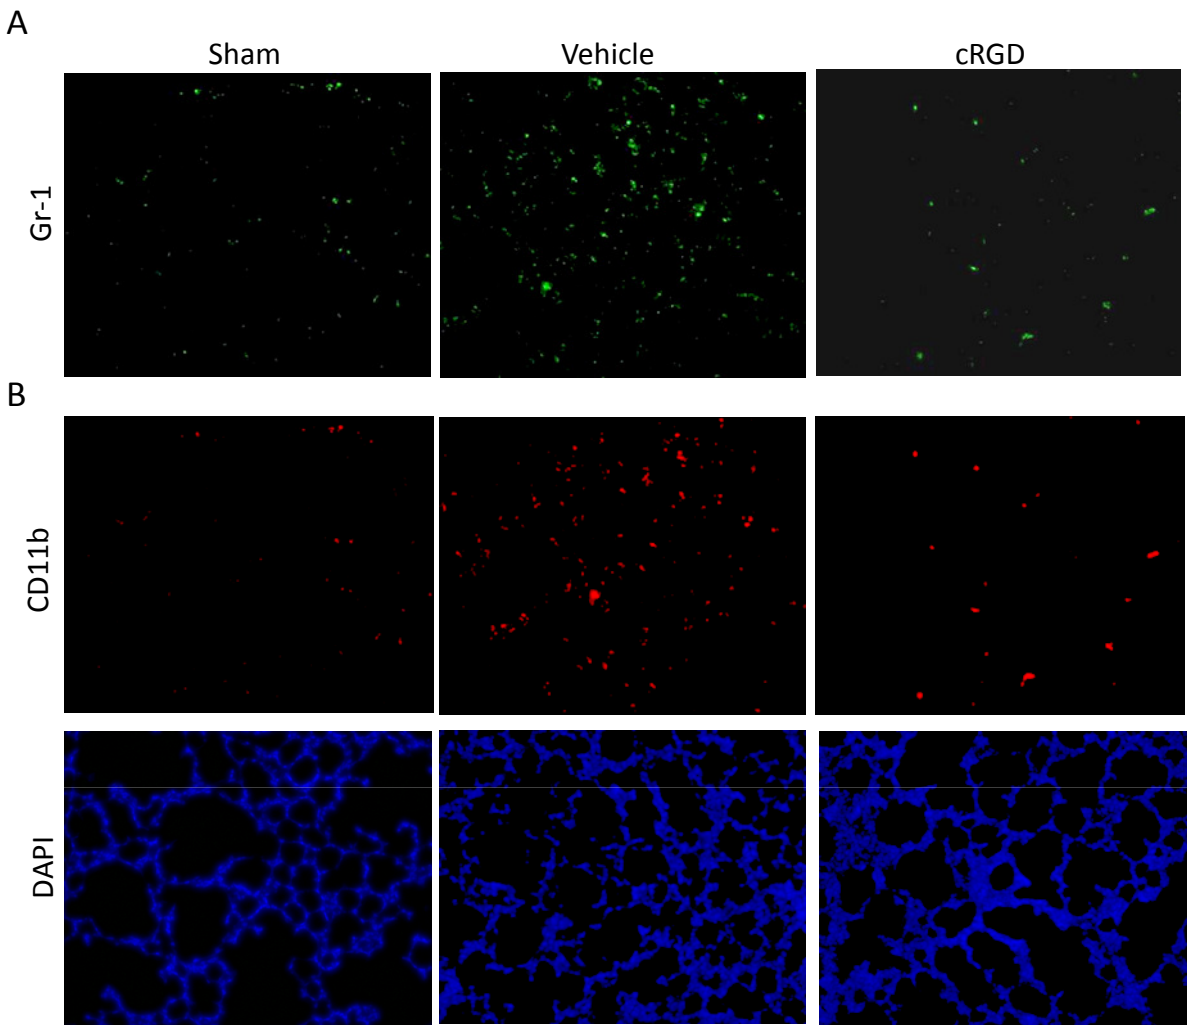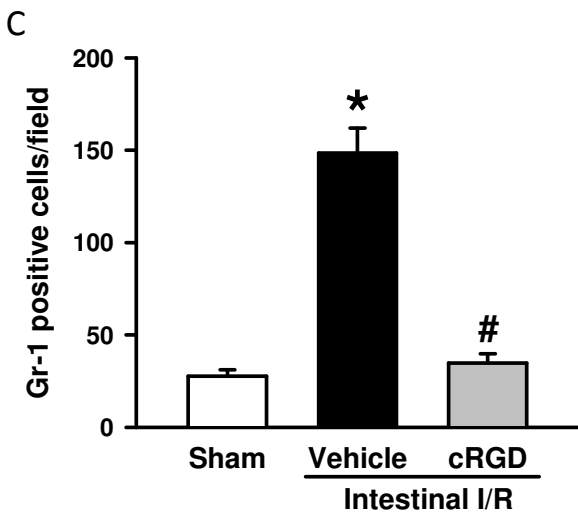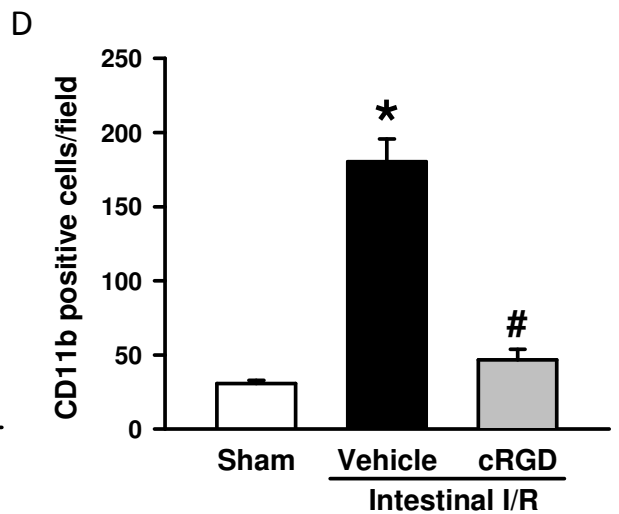

Supplement: MOESM4 [file 9711132]
